# Supplementary material for: A Novel Highly Divergent Strain of Cell Fusing Agent Virus (CFAV) in Mosquitoes from the Brazilian Amazon Region
Source: PubMed Central journal article supplement (PMC6315449; doi:10.3390/v10120666), 2018-11-24
Supplement: viruses-10-00666-s001.pdf [file viruses-10-00666-s001.pdf]

**Table S1.** Genetic distances of the near full-length genomes of CFAV strains obtained from this study (Macapá 01 and Macapá 02) and recovered from GenBank.

| Comparison                 | Genetic distance (standard error) |
|----------------------------|-----------------------------------|
| Macapá 01 versus GQ165810  | 0.001 ( $\pm 0.001$ )             |
| Macapá 01 versus NC001564  | 0.022 ( $\pm 0.001$ )             |
| Macapá 02 versus GQ165810  | 0.052 ( $\pm 0.003$ )             |
| Macapá 01 versus Macapá 02 | 0.053 ( $\pm 0.002$ )             |

Genetic distances were estimated using maximum composite likelihood method plus gamma distribution. Variance was estimated using 500 bootstrap replications. Estimations were made using Mega software version 7.0.

**Table S2.** Characteristics of the near full-length genome sequence (number of amino acid—aa, and nucleotide—nt) of the strain Macapá 01 and its similarity (%) with sequences of flaviviruses from GenBank according to name of the flavivirus and accession number of each sequences and genome region.

| Macapá 01 | C    |      | pr   |      | M    |      | E    |      | NS1  |      | NS2A |      | NS2B |      | NS3  |      | NS4A |      | 2k protein |      | NS4B  |      | NS5  |      | Polyprotein |       |  |
|-----------|------|------|------|------|------|------|------|------|------|------|------|------|------|------|------|------|------|------|------------|------|-------|------|------|------|-------------|-------|--|
|           | 128  | 384  | 91   | 273  | 56   | 168  | 430  | 1290 | 358  | 1074 | 239  | 717  | 149  | 447  | 587  | 1761 | 135  | 405  | 29         | 69   | 257   | 771  | 888  | 2664 | 3341        | 10023 |  |
|           | aa   | nt   | aa   | nt   | aa   | nt   | aa   | nt   | aa   | nt   | aa   | nt   | aa   | nt   | aa   | nt   | aa   | nt   | aa         | nt   | aa    | nt   | aa   | nt   | aa          | nt    |  |
| AeFV      |      |      |      |      |      |      |      |      |      |      |      |      |      |      |      |      |      |      |            |      |       |      |      |      |             |       |  |
| NC012932  | 18,4 | 32,8 | 24,7 | 41,5 | 37,5 | 51,5 | 33,3 | 44,5 | 63,4 | 60,8 | 61,4 | 63   | 49,7 | 59,3 | 72,1 | 65,7 | 50,4 | 55,8 | 82,6       | 68   | 58,80 | 61,5 | 78,8 | 69,2 | 59,7        | 58    |  |
| CFAV      |      |      |      |      |      |      |      |      |      |      |      |      |      |      |      |      |      |      |            |      |       |      |      |      |             |       |  |
| NC001564  | 92,2 | 94   | 97,8 | 97   | 100  | 98   | 98,8 | 96,3 | 99,4 | 95,3 | 98,7 | 98   | 97,3 | 98   | 98,8 | 97,7 | 100  | 97,3 | 100        | 98,6 | 99,2  | 97,5 | 98,6 | 97,5 | 98,6        | 97    |  |
| CxFV      |      |      |      |      |      |      |      |      |      |      |      |      |      |      |      |      |      |      |            |      |       |      |      |      |             |       |  |
| NC008604  | 38,3 | 52,7 | 82,1 | 67,7 | 69,7 | 62,8 | 71,9 | 67,7 | 34,6 | 43,9 | 18,4 | 33,4 | 14,4 | 34,7 | 40,2 | 47,5 | 11,9 | 30,9 | 26,1       | 36,2 | 19,8  | 38,8 | 58,2 | 58,7 | 44          | 48,6  |  |
| DENV-2    |      |      |      |      |      |      |      |      |      |      |      |      |      |      |      |      |      |      |            |      |       |      |      |      |             |       |  |
| NC001474  | 16,7 | 32,4 | 17,8 | 37   | 15,6 | 32,4 | 9,4  | 29,3 | 10   | 28   | 11,5 | 31,5 | 11,5 | 30,9 | 13   | 33   | 11,8 | 29   | 21,7       | 37,7 | 11,3  | 34,4 | 38,3 | 47,2 | 16,8        | 34    |  |
| YFV       |      |      |      |      |      |      |      |      |      |      |      |      |      |      |      |      |      |      |            |      |       |      |      |      |             |       |  |
| NC002031  | 17,2 | 32   | 10,1 | 37,3 | 14,3 | 35,4 | 11,6 | 31,8 | 17,3 | 29   | 13,2 | 30,4 | 13,8 | 35,2 | 14,3 | 33,7 | 14   | 34,1 | 26,1       | 37,7 | 8,8   | 31,1 | 38   | 47   | 15,9        | 33,5  |  |
| ZIKV      |      |      |      |      |      |      |      |      |      |      |      |      |      |      |      |      |      |      |            |      |       |      |      |      |             |       |  |
| NC012532  | 14,2 | 30,4 | 12,4 | 31,5 | 18,5 | 35,4 | 9,1  | 30,6 | 11,5 | 29,5 | 12,1 | 31,6 | 11,5 | 33,3 | 17,5 | 34,8 | 11,3 | 31,5 | 17,4       | 39,1 | 9,7   | 33,7 | 37,8 | 46,6 | 15,6        | 34,3  |  |

**Table S3.** Characteristics of the near full-length genome sequence (number of amino acid—aa, and nucleotide—nt) of the strain Macapá 05 and its similarity (%) with sequences of flaviviruses from GenBank according to name of the flavivirus and accession number of each sequences and genome region.

| Macapá 05          | C         |           | pr        |          | M         |          | E          |           | NS1        |           | NS2A      |           | NS2B      |           | NS3        |           | NS4A      |           | 2k protein |          | NS4B      |           | NS5        |           | Polyprotein |            |
|--------------------|-----------|-----------|-----------|----------|-----------|----------|------------|-----------|------------|-----------|-----------|-----------|-----------|-----------|------------|-----------|-----------|-----------|------------|----------|-----------|-----------|------------|-----------|-------------|------------|
|                    | 414<br>nt | 138<br>aa | 252<br>nt | 84<br>aa | 180<br>nt | 60<br>aa | 1281<br>nt | 427<br>aa | 1179<br>nt | 393<br>aa | 606<br>nt | 202<br>aa | 438<br>nt | 146<br>aa | 1764<br>nt | 588<br>aa | 468<br>nt | 156<br>aa | 69<br>nt   | 23<br>aa | 771<br>nt | 257<br>aa | 2667<br>nt | 889<br>aa | 10092<br>nt | 3363<br>aa |
| AeFV<br>NC012932   | 45,1      | 20        | 42,7      | 19,8     | 50,5      | 36,7     | 47,9       | 32,8      | 52,2       | 35,6      | 31,4      | 18,4      | 31,5      | 18,2      | 46,9       | 42,9      | 35,1      | 12,8      | 43,9       | 27,3     | 36,6      | 19,5      | 57,6       | 58,4      | 43          | 34,6       |
| CFAV<br>NC001564   | 53,4      | 39,1      | 67        | 72,6     | 65,5      | 69,6     | 66,7       | 70,5      | 52,1       | 34,9      | 35,2      | 20,9      | 36,1      | 15,1      | 47,3       | 44,3      | 30,6      | 11,9      | 37,9       | 22,7     | 37,9      | 20,2      | 58,5       | 57,3      | 50,4        | 43,4       |
| CxFV<br>NC008604   | 89,4      | 89,9      | 86,1      | 89,3     | 89,4      | 95       | 87,4       | 94,4      | 88         | 93,9      | 93,4      | 93,6      | 90,9      | 92,5      | 86,6       | 92,9      | 88,7      | 95,5      | 82,6       | 82,6     | 81,1      | 84        | 88,1       | 93,7      | 87,7        | 92,6       |
| DENV-2<br>NC001474 | 37,7      | 14        | 39,3      | 13,1     | 39,9      | 16,7     | 41         | 10,2      | 43,6       | 17,6      | 30,5      | 21,2      | 35,5      | 22,2      | 31,9       | 31,4      | 29,9      | 18,3      | 39,1       | 30,4     | 29,8      | 10,5      | 45,1       | 37,3      | 34,3        | 17,8       |
| YFV<br>NC002031    | 42,8      | 15,7      | 44,4      | 11       | 40,7      | 15,8     | 41,6       | 11,7      | 44         | 20,4      | 31,1      | 23,5      | 35,1      | 20,1      | 32,6       | 30,2      | 31,2      | 12,7      | 36,2       | 21,7     | 32,1      | 11,3      | 45,1       | 35,9      | 34,6        | 17,5       |
| ZIKV<br>NC012532   | 38,3      | 14,8      | 46,1      | 11,9     | 44,5      | 15,8     | 43,1       | 9,4       | 43,6       | 17,6      | 30,5      | 31,3      | 35,6      | 12,6      | 35,2       | 31,7      | 31,5      | 12,6      | 42,4       | 18,2     | 31,1      | 12,4      | 46,6       | 38,1      | 34,9        | 17         |
